# Supplementary material for: Endocrine-Disrupting Chemicals (EDCs): In Vitro Mechanism of Estrogenic Activation and Differential Effects on ER Target Genes
Source: PubMed Central journal article supplement (PMC3620735; doi:10.1289/ehp.1205951), 2013-02-05
Supplement: ehp.1205951.s001.pdf [file ehp.1205951.s001.pdf]

## Supplemental Material

### Endocrine-Disrupting Chemicals (EDCs): *In Vitro* Mechanism of Estrogenic Activation and Differential Effects on ER Target Genes

Yin Li, Colin J. Luh, Katherine A. Burns, Yukitomo Arao, Zhongliang Jiang, Christina T. Teng, Raymond R. Tice, and Kenneth S. Korach

#### Table of Contents

|                                                                                                                                            |   |
|--------------------------------------------------------------------------------------------------------------------------------------------|---|
| Table S1. EDC information .....                                                                                                            | 2 |
| Methods: Construction of the full-length mouse ER $\beta$ expression plasmid.....                                                          | 3 |
| Figure S1. EDCs act as agonists on a mutant ER $\beta$ to activate the classical mechanism (ERE) in HepG2 and HeLa cells. ....             | 4 |
| Figure S2. EDCs act as agonists on a mutant ER $\beta$ to activate the activate the tethered mechanism (AP-1) in HepG2 and HeLa cells..... | 5 |
| Reference .....                                                                                                                            | 6 |

**Table S1. EDC information**

| <b>EDCs</b>                                               | <b>CAS No.</b> | <b>Supplier</b>            |
|-----------------------------------------------------------|----------------|----------------------------|
| 17 $\beta$ -estradiol (E2)                                | 50-28-2        | Sigma-Aldrich              |
| ICI 182,780 (ICI)                                         | 129453-61-8    | Sigma-Aldrich              |
| <b>Group 1</b>                                            |                |                            |
| Bisphenol A (BPA)                                         | 80-05-7        | Sigma-Aldrich              |
| Bisphenol AF (BPAF)                                       | 1478-61-1      | Sigma-Aldrich              |
| 2-2-bis(p-hydroxyphenyl)-<br>1,1,1-trichloroethane (HPTE) | 72-43-5        | Sigma-Aldrich              |
| 4-n-Nonylphenol (4-n-NP)                                  | 104-40-5       | Alfa Aesar                 |
| <b>Group 2</b>                                            |                |                            |
| Daidzein (Dai)                                            | 486-66-8       | Alfa Aesar                 |
| Genistein (Gen)                                           | 446-72-0       | Sigma-Aldrich              |
| Kaempferol (Kaem)                                         | 520-18-3       | Indofine Chemical Co., Inc |
| Apigenin (Api)                                            | 520-36-5       | Sigma-Aldrich              |
| Coumestrol (Coum)                                         | 479-13-0       | Enzo Life Sciences         |
| <b>Group 3</b>                                            |                |                            |
| Endosulfan (Endo)                                         | 115-29-7       | ChemService, Inc.          |
| Kepone (Kep)                                              | 143-50-0       | Supelco                    |
| 1-Bromopropane (1-BP)                                     | 106-94-5       | Aldrich Chemical Co.       |

## **Methods: Construction of the full-length mouse ER $\beta$ expression plasmid**

The pcDNA3/WT-ER $\beta$  plasmid (**pcDNA/WT-ER $\beta$** ) was generated as follows, the cDNA fragments of mouse ER $\beta$  (mER $\beta$ -N-terminal and mER $\beta$ -C-terminal) were amplified by PCR using the following primer sets respectively, mER $\beta$ -N-ter\_5' \_BglII; 5'-AGA TCT CTG AGA GCA TCA TGA GCA TCT GTG CCT C-3' and mER $\beta$ -N-ter\_3'; 5'-CAC TGG TTC TCT TGG CTT TGT TCA GGC AAT GC-3', mER $\beta$ -C-ter\_5'; 5'-CAA GTG TTA CGA AGT AGG AAT GGT CAA GTG TGG-3' and mER $\beta$ -C-ter\_3'; 5'-TCT CTG CTT CCT GGC TTG CGG TAG C-3'. The amplified fragments were cloned into pCR2.1 by TA-cloning kit (Invitrogen) and sequenced (NIEHS sequencing core). The KpnI-PstI digested fragment of mER $\beta$ -C-terminal was replaced with the KpnI-PstI fragment of pBluescript-mER $\beta$ 310G-C-terminal plasmid that contains KpnI-XbaI fragment of mER $\beta$  cDNA from the pcDNA3/ $\Delta$ NmER $\beta$ 310G (**pcDNA/ $\Delta$ NER $\beta$ G**) (Mueller et al, 2003) to generate pBluescript-mER $\beta$ -C-terminal plasmid. The KpnI-XbaI fragment of pBluescript-mER $\beta$ -C-terminal plasmid and the KpnI fragment of pCR2.1-mER $\beta$ -N-terminal plasmid were replaced with the KpnI-XbaI fragment of **pcDNA/ $\Delta$ NER $\beta$ G** to generate **pcDNA/WT-ER $\beta$**  plasmid. The direction of inserted fragment was determined by EcoRI digestion and sequencing.

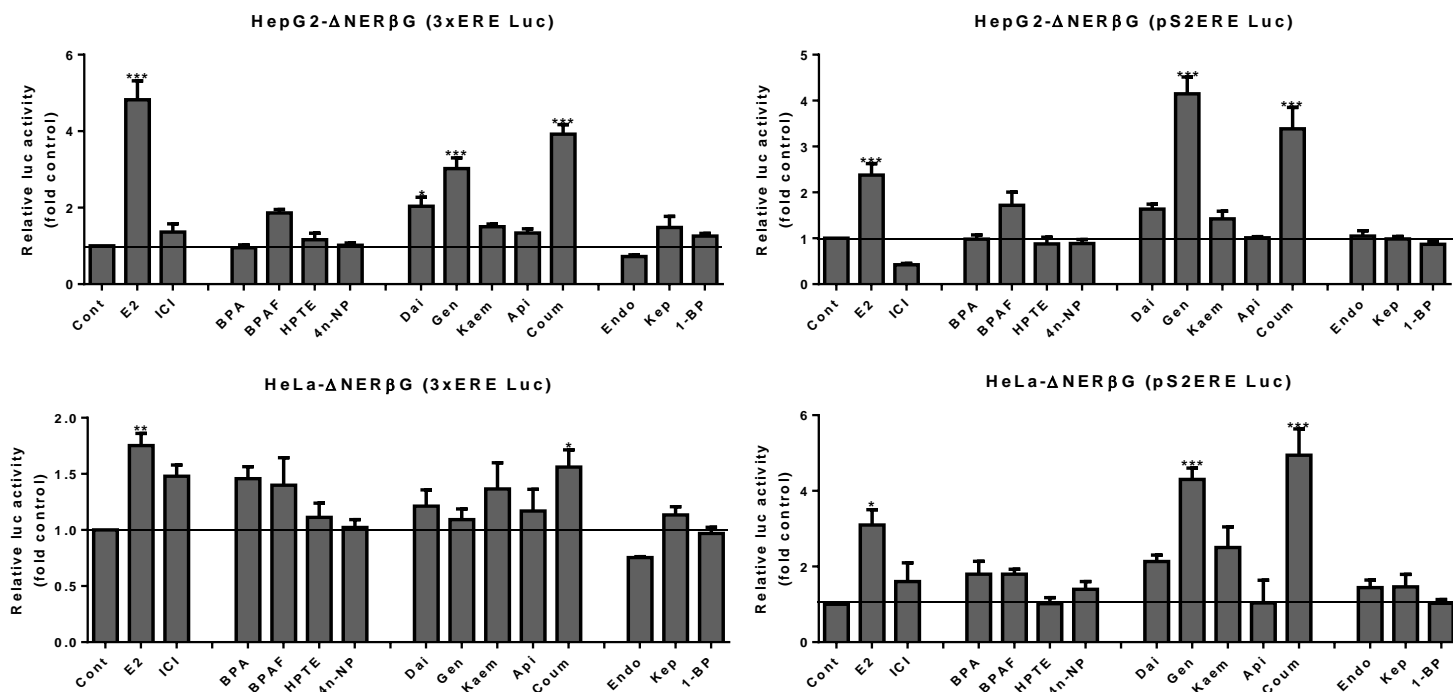

**Figure S1. EDCs act as agonists on a mutant ERβ to activate the classical mechanism (ERE) in HepG2 and HeLa cells.**

Cells were transfected with ERE-luc (3xERE or pS2 ERE), pRL-TK and pcDNA/ΔNERβG plasmids overnight. After changing to fresh starve medium, cells were treated with the vehicle (control), 10 nM E2, 100 nM ICI or EDCs for 18 hours. ERβ ERE-mediated activation was detected by luciferase reporter assays as described in Material and Methods. Data shown is representative of triplicates as fold increase calculated relative to the vehicle (control) ± SEM, \*\*\*,  $p < 0.001$ , \*\*,  $p < 0.01$ , \*,  $p < 0.05$  compared to vehicle (control).

**A**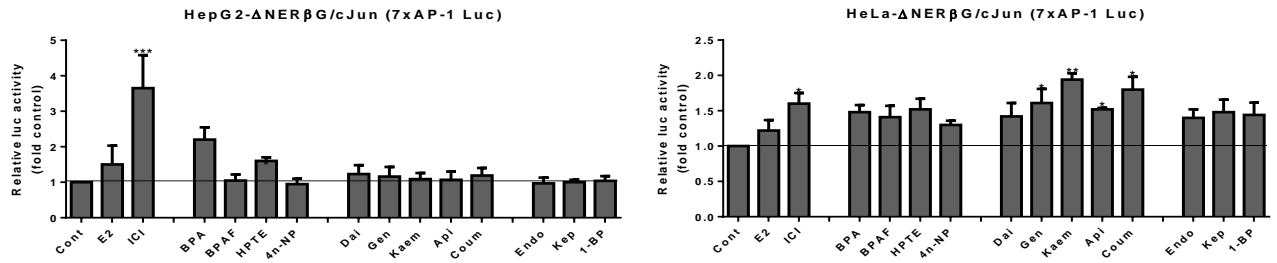**B**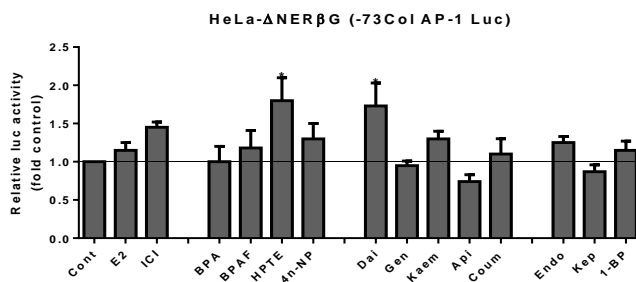

**Figure S2. EDCs act as agonists on a mutant ERβ to activate the activate the tethered mechanism (AP-1) in HepG2 and HeLa cells.**

(A) Effects on 7xAP-1 Luc reporter activity in HepG2 and HeLa cells. Cells were transfected with 7xAP-1 Luc, pRL-TK, pcDNA/ΔNERβG and pRSV/c-Jun plasmids overnight. After changing to fresh starve medium, cells were treated with the vehicle (control), 10 nM E2, 100 nM ICI or EDCs for 18 hours. ERβ AP-1-mediated activation was detected by luciferase reporter assays as described in Material and Methods. (B) Effects on -73Col AP-1 Luc reporter activity in HeLa cells. Cells were transfected with -73Col AP-1 Luc, pRL-TK, and pcDNA/ΔNERβG plasmids overnight. After changing to fresh starve medium, cells were treated with the vehicle (control), 10 nM E2, 100 nM ICI, or EDCs for 18 hours. ER -73Col AP-1-mediated activation were detected by luciferase reporter assays as described in Material and Methods. Data shown is representative of triplicates as fold increase calculated relative to the vehicle (control) ± SEM, \*\*\*,  $p < 0.001$ , \*\*,  $p < 0.01$ , \*,  $p < 0.05$  compared to vehicle (control).

## **Reference**

Mueller SO, Hall JM, Swope DL, Pedersen LC, Korach KS. 2003. Molecular determinants of the stereoselectivity of agonist activity of estrogen receptors (ER) alpha and beta. *The Journal of biological chemistry* 278(14):12255-12262.
